# Supplementary material for: Analysis of chi angle distributions in free amino acids via multiplet fitting of proton scalar couplings
Source: Copernicus journal article supplement (doi:10.5194/mr-5-103-2024), 2024-08-19
Supplement: Supplementary file [file mr-5-103-2024-supplement-title-page.pdf › mr-5-103-2024-supplement-title-page.pdf]

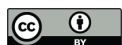

## *Supplement of*

# **Analysis of chi angle distributions in free amino acids via multiplet fitting of proton scalar couplings**

**Nabiha R. Syed et al.**

*Correspondence to:* Colin A. Smith ([colin.smith@wesleyan.edu](mailto:colin.smith@wesleyan.edu))

- mr-5-103-2024-supplement-title-page.pdf
- Syed2024
  - DatasetForBBDepRL2010.txt
  - README.md
  - Syed2024.Rmd
  - Syed2024.bib
  - aa\_images
    - \* beta.pml
    - \* ile.pml
  - copernicus.bst
  - copernicus.cfg
  - copernicus.cls
  - data
    - \* aa\_images.tar.gz
    - \* aa\_model.tar.gz
    - \* fit1d\_fitnmr\_output.tar.gz
    - \* fit1d\_fitnmr\_start.tar.gz
    - \* fit1d\_gissmo.tar.gz
    - \* fit1d\_nmrpipe\_com.tar.gz
    - \* fit1d\_nmrpipe\_output.tar.gz
  - pdfscreen.sty
  - pdfscreencomp.sty
  - scripts
    - \* aa\_model\_download.sh
    - \* fit1d\_fitnmr\_run.sh
    - \* fit1d\_gissmo\_download.sh

- \* fit1d\_gissmo\_unzip.sh
- \* fit1d\_nmrpipe\_run.sh
- \* refit\_peaks.R

The copyright of individual parts of the supplement might differ from the article licence.
